# Supplementary material
Source: ML conference proceedings conference paper supplement (https://openreview.net/forum?id=DqWvxSQ1TK)
Supplement: supplementary_material [file attachment]

## Sheet: Review
Reviewer	Paper ID	Title	Publication	Year	Q1	Q2	Q3	Q4	Q5	Q6	Q7	Q8	Q9	Q10	Q11	Q12	Q_uncer	Q13
RW5	56	Deep Dual Learning for Semantic Image Segmentation	ICCV	2017	Referenced	Yes	Not considered	No preprocessing	Not clear/Insufficiently described	Not used	Not used	Not used	Not used	Not clear	No	No		No
RW5	202	Deep Supervision with Additional Labels for Retinal Vessel Segmentation Task	MICCAI	2018	Yes stated or possible to calculate	Yes	Considered	Preprocessing the entire data but no risk of leakage	Done on train data	Not used	Not used	Not used	Not clear/Insufficiently described	Not clear	No	No		No
RW5	242	Brain Tumor Segmentation with Missing Modalities via Latent Multi-source Correlation Representation	MICCAI	2020	Yes stated or possible to calculate	Yes	Not considered	Preprocessing the entire data but no risk of leakage	No augmentation	Not used	There is no risk for dependence between train and test data	Not used	Not used	Yes	No	No		No
RW5	153	Minimum S-Excess Graph for Segmenting and Tracking Multiple Borders with HMM	MICCAI	2015	Yes stated or possible to calculate	No	Not considered	No preprocessing	No augmentation	Not used	There is no risk for dependence between train and test data	Not used	Not used	Yes	No	Yes	Test set	No
RW5	78	InstaBoost: Boosting Instance Segmentation via Probability Map Guided Copy-Pasting	ICCV	2019	Yes stated or possible to calculate	Yes	Not considered	No preprocessing	Done on train data	Not used	Not used	Not clear/Insufficiently described	Not used	Not clear	No	No		Yes
RW5	254	Endoscopic Polyp Segmentation Using a Hybrid 2D/3D CNN	MICCAI	2020	Yes stated or possible to calculate	Yes	Not considered	Preprocessing the entire data but no risk of leakage	Not clear/Insufficiently described	Not used	There is no risk for dependence between train and test data	Not used	Not used	Not clear	Not clear/Insufficiently described	Yes	Test set	No
RW5	15	Segmentation Driven Object Detection with Fisher Vectors	ICCV	2013	Yes stated or possible to calculate	Yes	Not considered	No preprocessing	No augmentation	Not used	Not used	Done on train set	Not used	Yes	No	No		No
RW5	233	Segmentation of Vessels in Ultra High Frequency Ultrasound Sequences Using Contextual Memory	MICCAI	2019	Yes stated or possible to calculate	Yes	Not considered	Preprocessing the entire data but no risk of leakage	Done on train data	Not used	There is no risk for dependence between train and test data	Not used	Not clear/Insufficiently described	Not clear	No	Yes	Cross-validation or other resampling methods	No
RW5	223	Integrating Cross-modality Hallucinated MRI with CT to Aid Mediastinal Lung Tumor Segmentation	MICCAI	2019	Yes stated or possible to calculate	Yes	Not considered	No preprocessing	No augmentation	Not used	There is no risk for dependence between train and test data	Done on train set	Not used	Yes	No	Yes	Test set	No
RW5	247	CNN-GCN Aggregation Enabled Boundary Regression for Biomedical Image Segmentation	MICCAI	2020	Yes stated or possible to calculate	Yes	Not considered	Preprocessing the entire data but no risk of leakage	Done on train data	Not used	Not used	Not used	Not used	Yes	No	No		No
RW5	36	Motion Trajectory Segmentation via Minimum Cost Multicuts	ICCV	2015	Yes stated or possible to calculate	Yes	Not considered	No preprocessing	No augmentation	Not used	There is no risk for dependence between train and test data	Not used	Not used	Yes	No	No		No
RW5	173	Deep Neural Networks for Fast Segmentation of 3D Medical Images	MICCAI	2016	Yes stated or possible to calculate	Yes	Not considered	Preprocessing the entire data but no risk of leakage	No augmentation	Not used	There is no risk for dependence between train and test data	Not used	Not used	Yes	No	Yes	Test set	No
RW5	260	M-SEAM-NAM: Multi-instance Self-supervised Equivalent Attention Mechanism with Neighborhood Affinity Module for Double Weakly Supervised Segmentation of COVID-19	MICCAI	2021	Yes stated or possible to calculate	No	Considered	Preprocessing the entire data but no risk of leakage	Done on train data	Not used	There is no risk for dependence between train and test data	Not used	Not used	Yes	No	Yes	Independent test set	Yes
RW5	230	Weakly Supervised Cell Instance Segmentation by Propagating from Detection Response	MICCAI	2019	Yes stated or possible to calculate	Yes	Not considered	Preprocessing the entire data but no risk of leakage	No augmentation	Not used	Not used	Not used	Not used	Yes	Yes partially	No		Yes
RW5	90	Semi-Supervised Semantic Segmentation with Pixel-Level Contrastive Learning from a Class-wise Memory Bank	ICCV	2021	Yes stated or possible to calculate	Yes	Not considered	Preprocessing the entire data but no risk of leakage	Not clear/Insufficiently described	Not used	Not used	Not used	Not used	Not clear	Not clear/Insufficiently described	No		Yes
RW5	229	Adversarial Optimization for Joint Registration and Segmentation in Prostate CT Radiotherapy	MICCAI	2019	Yes stated or possible to calculate	Yes	Not considered	Preprocessing the entire data but no risk of leakage	No augmentation	Not used	There is no risk for dependence between train and test data	Not used	Not used	Yes	No	Yes	Test set	No
RW5	101	Automated Segmentation of CBCT Image Using Spiral CT Atlases and Convex Optimization	MICCAI	2013	Yes stated or possible to calculate	No	Considered	Not clear	No augmentation	Not used	There is no risk for dependence between train and test data	Done on train set	Not used	Not clear	Yes thoroughly	Yes	Test set	No
RW5	135	Sparse Appearance Learning Based Automatic Coronary Sinus Segmentation in CTA	MICCAI	2014	Yes stated or possible to calculate	No	Not considered	No preprocessing	No augmentation	Not used	Not clear/Insufficiently described	Not clear/Insufficiently described	Not clear/Insufficiently described	Not clear	No	Yes	Cross-validation or other resampling methods	No
RW5	237	A Joint 3D+2D Fully Convolutional Framework for Subcortical Segmentation	MICCAI	2019	Yes stated or possible to calculate	Yes	Not considered	No preprocessing	No augmentation	Not used	There is no risk for dependence between train and test data	Not used	Done correctly within the loop	Yes	No	Yes	Cross-validation or other resampling methods	No
RW5	85	Video Object Segmentation with Dynamic Memory Networks and Adaptive Object Alignment	ICCV	2021	Yes stated or possible to calculate	Yes	Not considered	No preprocessing	No augmentation	Not used	There is no risk for dependence between train and test data	Not used	Not used	Yes	No	No		No
RW5	196	Automatic Liver Segmentation Using an Adversarial Image-to-Image Network	MICCAI	2017	Yes stated or possible to calculate	No	Considered	No preprocessing	No augmentation	Not used	There is no risk for dependence between train and test data	Done on train set	Not used	Yes	No	Yes	Independent test set	No
RW5-X	20	TransCut: Transparent Object Segmentation from a Light-Field Image	ICCV	2015
RW5	97	Robust Trust Region for Weakly Supervised Segmentation	ICCV	2021	No	Yes	Not considered	Not clear	No augmentation	Not used	Not clear/Insufficiently described	Done on train set	Not used	Not clear	No	No		Yes
RW5	111	Automated Segmentation and Geometrical Modeling of the Tricuspid Aortic Valve in 3D Echocardiographic Images	MICCAI	2013	Yes stated or possible to calculate	No	Not considered	Preprocessing the entire data before split with risk of leakage	No augmentation	Not used	There is no risk for dependence between train and test data	Not used	Done incorrectly outside the loop	No	No baselines/Nothing to tune	Yes	Cross-validation or other resampling methods	No
RW5-X	117	Registration of Free-Breathing 3D+t Abdominal Perfusion CT Images via Co-segmentation	MICCAI	2013
RW5	130	Multi-atlas Spectral PatchMatch: Application to Cardiac Image Segmentation	MICCAI	2014	Yes stated or possible to calculate	Yes	Not considered	Not clear	No augmentation	Not used	There is no risk for dependence between train and test data	Not used	Not clear/Insufficiently described	Not clear	No	Yes	Cross-validation or other resampling methods	No
RW5	255	Unsupervised Learning for CT Image Segmentation via Adversarial Redrawing	MICCAI	2020	Yes stated or possible to calculate	Yes	Considered	No preprocessing	No augmentation	Not used	There is no risk for dependence between train and test data	Not clear/Insufficiently described	Done correctly within the loop	Not clear	No	Yes	Cross-validation or other resampling methods	No
RW5	182	Automatic 3D Cardiovascular MR Segmentation with Densely-Connected Volumetric ConvNets	MICCAI	2017	Yes stated or possible to calculate	Yes	Not considered	Preprocessing the entire data but no risk of leakage	Done on train data	Not used	There is no risk for dependence between train and test data	Not used	Not clear/Insufficiently described	Not clear	No	Yes	Not clear/Insufficiently described	Yes
RW5-X	112	Fast Globally Optimal Segmentation of 3D Prostate MRI with Axial Symmetry Prior	MICCAI	2013
RW5	221	Impact of Adversarial Examples on Deep Learning Models for Biomedical Image Segmentation	MICCAI	2019	No	Yes	Not considered	Not clear	No augmentation	Not used	Not clear/Insufficiently described	Not clear/Insufficiently described	Not used	Not clear	No baselines/Nothing to tune	Yes	Not clear/Insufficiently described	Yes
RW2-X	131	Towards Automatic Plan Selection for Radiotherapy of Cervical Cancer by Fast Automatic Segmentation of Cone Beam CT Scans	MICCAI	2014	Yes stated or possible to calculate	No	Considered
RW2	41	Curriculum Domain Adaptation for Semantic Segmentation of Urban Scenes	ICCV	2017	Yes stated or possible to calculate	Yes	Considered	Not clear	Not clear/Insufficiently described	Not used	Not used	Not used	Not used	Not clear	No baselines/Nothing to tune	No		No
RW2	240	PraNet: Parallel Reverse Attention Network for Polyp Segmentation	MICCAI	2020	Referenced	Yes	Not clear	No preprocessing	No augmentation	Not used	Not used	Not used	Not used	Yes	Not clear/Insufficiently described	No		Yes
RW2-X	150	Positive Delta Detection for Alpha Shape Segmentation of 3D Ultrasound Images of Pathologic Kidneys	MICCAI	2015
RW2	94	Predictive Feature Learning for Future Segmentation Prediction	ICCV	2021	Yes stated or possible to calculate	Yes	Not clear	Not clear	No augmentation	Not used	There is no risk for dependence between train and test data	Not clear/Insufficiently described	Not used	Not clear	No	No		No
RW2	270	MT-UDA: Towards Unsupervised Cross-modality Medical Image Segmentation with Limited Source Labels	MICCAI	2021	Yes stated or possible to calculate	Yes	Not considered	Preprocessing the entire data but no risk of leakage	No augmentation	Not used	There is no risk for dependence between train and test data	Not clear/Insufficiently described	Not used	Not clear	No	No		No
RW2	191	Boundary-Aware Fully Convolutional Network for Brain Tumor Segmentation	MICCAI	2017	Yes stated or possible to calculate	Yes	Not considered	Not clear	Done on train data	Not used	There is no risk for dependence between train and test data	Not used	Done correctly within the loop	Yes	No	No		No
RW2	186	Towards Image-Guided Pancreas and Biliary Endoscopy: Automatic Multi-organ Segmentation on Abdominal CT with Dense Dilated Networks	MICCAI	2017	Yes stated or possible to calculate	No	Not considered	Not clear	No augmentation	Not used	There is no risk for dependence between train and test data	Not clear/Insufficiently described	Done correctly within the loop	Not clear	Not clear/Insufficiently described	Yes	Cross-validation or other resampling methods	No
RW2	285	Y-Net: A Spatiospectral Dual-Encoder Network for Medical Image Segmentation	MICCAI	2022	Referenced	Yes	Not considered	Not clear	No augmentation	Not used	Not used	Not clear/Insufficiently described	Not used	Not clear	Yes partially	No		No
RW2	201	Accurate Weakly-Supervised Deep Lesion Segmentation Using Large-Scale Clinical Annotations: Slice-Propagated 3D Mask Generation from 2D RECIST	MICCAI	2018	Yes stated or possible to calculate	Yes	Not considered	Preprocessing the entire data but no risk of leakage	No augmentation	Not used	There is risk for dependence between train and test data	Not clear/Insufficiently described	Not used	No	Not clear/Insufficiently described	Yes	Test set	No
RW2	245	Domain Adaptive Relational Reasoning for 3D Multi-organ Segmentation	MICCAI	2020	Not clearly stated	Yes	Not considered	Not clear	No augmentation	Not used	There is no risk for dependence between train and test data	Not clear/Insufficiently described	Not used	Not clear	Not clear/Insufficiently described	No		No
RW2	274	Modality Completion via Gaussian Process Prior Variational Autoencoders for Multi-modal Glioma Segmentation	MICCAI	2021	Referenced	Yes	Not considered	Not clear	No augmentation	Not used	Not clear/Insufficiently described	Not clear/Insufficiently described	Not clear/Insufficiently described	Not clear	Not clear/Insufficiently described	Yes	Other	Yes
RW2	159	DeepOrgan: Multi-level Deep Convolutional Networks for Automated Pancreas Segmentation	MICCAI	2015	Yes stated or possible to calculate	No	Not considered	Not clear	Done on train data	Not used	There is no risk for dependence between train and test data	Not clear/Insufficiently described	Not clear/Insufficiently described	Not clear	Not clear/Insufficiently described	Yes	Cross-validation or other resampling methods	No
RW2	257	Learning High-Resolution and Efficient Non-local Features for Brain Glioma Segmentation in MR Images	MICCAI	2020	Yes stated or possible to calculate	Yes	Not considered	Preprocessing the entire data but no risk of leakage	Done on train data	Not used	There is no risk for dependence between train and test data	Not used	Not used	Yes	No	No		No
RW2	203	Deep Random Walk for Drusen Segmentation from Fundus Images	MICCAI	2018	Yes stated or possible to calculate	Yes	Not considered	Not clear	Not clear/Insufficiently described	Not used	Not used	Not clear/Insufficiently described	Not used	Not clear	No	No		No
RW2	114	Learning from Multiple Experts with Random Forests: Application to the Segmentation of the Midbrain in 3D Ultrasound	MICCAI	2013	Yes stated or possible to calculate	Yes	Not considered	No preprocessing	No augmentation	Not used	There is no risk for dependence between train and test data	Not clear/Insufficiently described	Not clear/Insufficiently described	Not clear	No baselines/Nothing to tune	No		No
RW2	32	A Randomized Ensemble Approach to Industrial CT Segmentation	ICCV	2015	Yes stated or possible to calculate	No	Not considered	No preprocessing	No augmentation	Not used	There is no risk for dependence between train and test data	Not used	Not used	Yes	No baselines/Nothing to tune	Not clear/Insufficiently described	Not clear/Insufficiently described	No
RW2	158	Learning to Segment: Training Hierarchical Segmentation under a Topological Loss	MICCAI	2015	Yes stated or possible to calculate	Yes	Not considered	Not clear	No augmentation	Not used	Not used	Not clear/Insufficiently described	Not clear/Insufficiently described	Not clear	Not clear/Insufficiently described	No		Yes
RW2-X	50	Super-Trajectory for Video Segmentation	ICCV	2017
RW2	61	Fine-Grained Segmentation Networks: Self-Supervised Segmentation for Improved Long-Term Visual Localization	ICCV	2019	Yes stated or possible to calculate	Yes	Considered	Preprocessing the entire data but no risk of leakage	No augmentation	Not used	There is no risk for dependence between train and test data	Not clear/Insufficiently described	Not used	Not clear	Not clear/Insufficiently described	No		No
RW2	119	Deep Feature Learning for Knee Cartilage Segmentation Using a Triplanar Convolutional Neural Network	MICCAI	2013	Yes stated or possible to calculate	No	Considered	Preprocessing separately after splitting	No augmentation	Done on the train data only	There is no risk for dependence between train and test data	Done on train set	Done correctly within the loop	Yes	Not clear/Insufficiently described	Yes	Test set	No
RW2	99	Multi-View Radar Semantic Segmentation	ICCV	2021	Yes stated or possible to calculate	Yes	Considered	Not clear	No augmentation	Not used	There is no risk for dependence between train and test data	Not clear/Insufficiently described	Not used	Not clear	Not clear/Insufficiently described	No		No
RW2	261	A Spatial Guided Self-supervised Clustering Network for Medical Image Segmentation	MICCAI	2021	Yes stated or possible to calculate	Yes	Not considered	Not clear	No augmentation	Not used	Not used	Not clear/Insufficiently described	Not used	Not clear	No	No		No
RW2	248	Multi-task Dynamic Transformer Network for Concurrent Bone Segmentation and Large-Scale Landmark Localization with Dental CBCT	MICCAI	2020	Yes stated or possible to calculate	No	Considered	Preprocessing the entire data before split with risk of leakage	No augmentation	Not used	There is no risk for dependence between train and test data	Not clear/Insufficiently described	Not used	Not clear	No	No		No
RW2	46	Universal Adversarial Perturbations Against Semantic Image Segmentation	ICCV	2017	Yes stated or possible to calculate	Yes	Not considered	Preprocessing the entire data but no risk of leakage	No augmentation	Not used	Not used	Not clear/Insufficiently described	Not used	Not clear	No baselines/Nothing to tune	No		No
RW2	171	Topology Aware Fully Convolutional Networks for Histology Gland Segmentation	MICCAI	2016	Yes stated or possible to calculate	Yes	Not considered	Preprocessing the entire data but no risk of leakage	Done on train data	Not used	Not used	Done on train set	Not used	Yes	Yes partially	Yes	Test set	No
RW2	211	Tumor-Aware, Adversarial Domain Adaptation from CT to MRI for Lung Cancer Segmentation	MICCAI	2018	Some are stated and some are referenced	No	Not considered	Not clear	No augmentation	Not used	There is no risk for dependence between train and test data	Not clear/Insufficiently described	Not used	Not clear	No baselines/Nothing to tune	Yes	Test set	No
RW2-X	67	Convex Shape Prior for Multi-Object Segmentation Using a Single Level Set Function	ICCV	2019
RW2	217	Bridging the Gap Between 2D and 3D Organ Segmentation with Volumetric Fusion Net	MICCAI	2018	Some are stated and some are referenced	No	Not considered	Not clear	Done on train data	Not used	There is no risk for dependence between train and test data	Not clear/Insufficiently described	Not used	Not clear	No	Yes	Test set	No
RW2	239	Conditional Segmentation in Lieu of Image Registration	MICCAI	2019	Yes stated or possible to calculate	No	Not considered	Preprocessing the entire data but no risk of leakage	No augmentation	Not used	There is no risk for dependence between train and test data	Not clear/Insufficiently described	Done correctly within the loop	Not clear	No	Yes	Cross-validation or other resampling methods	No
RW4	110	Higher-Order CRF Tumor Segmentation with Discriminant Manifold Potentials	MICCAI	2013	Yes stated or possible to calculate	No	Not considered	Not clear	No augmentation	Not used	Not used	Not used	Not used	Yes	Not clear/Insufficiently described	Yes	Test set	No
RW4	131	Towards Automatic Plan Selection for Radiotherapy of Cervical Cancer by Fast Automatic Segmentation of Cone Beam CT Scans	MICCAI	2014	Yes stated or possible to calculate	No	Not considered	No preprocessing	No augmentation	Not used	Not used	Not used	Not used	Not clear	No baselines/Nothing to tune	Yes	Other	No
RW4	279	Learning with Noise: Mask-Guided Attention Model for Weakly Supervised Nuclei Segmentation	MICCAI	2021	Referenced	Yes	Not considered	No preprocessing	Not clear/Insufficiently described	Not used	Not used	Not used	Not used	Yes	No	Yes	Cross-validation or other resampling methods	Yes
RW4	240	PraNet: Parallel Reverse Attention Network for Polyp Segmentation	MICCAI	2020	Referenced	Yes	Considered	No preprocessing	No augmentation	Not used	Not used	Not used	Not used	Yes	No	No		Yes
RW4	169	3D U-Net: Learning Dense Volumetric Segmentation from Sparse Annotation	MICCAI	2016	Yes stated or possible to calculate	No	Not considered	Preprocessing the entire data but no risk of leakage	Done on train data	Not used	There is no risk for dependence between train and test data	Not used	Not used	Yes	No baselines/Nothing to tune	No		Yes
RW4	94	Predictive Feature Learning for Future Segmentation Prediction	ICCV	2021	Referenced	Yes	Not considered	No preprocessing	No augmentation	Not used	There is no risk for dependence between train and test data	Not used	Not used	No	No	No		No
RW4	65	Unsupervised Microvascular Image Segmentation Using an Active Contours Mimicking Neural Network	ICCV	2019	No	Yes	Considered	No preprocessing	No augmentation	Not used	There is risk for dependence between train and test data	Not used	Not used	No	No	No		Yes
RW4	191	Boundary-Aware Fully Convolutional Network for Brain Tumor Segmentation	MICCAI	2017	No	Yes	Not considered	Preprocessing the entire data but no risk of leakage	No augmentation	Not used	Not used	Not used	Not used	Yes	No	No		No
RW4	12	Symbiotic Segmentation and Part Localization for Fine-Grained Categorization	ICCV	2013	Referenced	Yes	Not considered	No preprocessing	Not clear/Insufficiently described	Not used	Not used	Not used	Not used	Yes	No baselines/Nothing to tune	No		No
RW4	285	Y-Net: A Spatiospectral Dual-Encoder Network for Medical Image Segmentation	MICCAI	2022	Referenced	Yes	Considered	No preprocessing	No augmentation	Not used	Not used	Done on train set	Not used	Yes	Yes partially	No		Yes
RW4	26	Weakly Supervised Graph Based Semantic Segmentation by Learning Communities of Image-Parts	ICCV	2015	Referenced	Yes	Not considered	No preprocessing	No augmentation	Not used	Not used	Not used	Not used	Yes	No	No		No
RW4	245	Domain Adaptive Relational Reasoning for 3D Multi-organ Segmentation	MICCAI	2020	Some are stated and some are referenced	Yes	Not considered	No preprocessing	No augmentation	Not used	Not used	Not used	Not used	Yes	No	No		Yes
RW4	28	Semantic Segmentation with Object Clique Potential	ICCV	2015	Referenced	Yes	Not considered	No preprocessing	Done on train data	Not used	Not used	Done on train set	Not used	Yes	No	No		No
RW4	159	DeepOrgan: Multi-level Deep Convolutional Networks for Automated Pancreas Segmentation	MICCAI	2015	Not clearly stated	No	Not considered	No preprocessing	Done on train data	Not used	There is no risk for dependence between train and test data	Not used	Not used	Yes	No baselines/Nothing to tune	Yes	Cross-validation or other resampling methods	Yes
RW4	137	Myocardial Infarct Segmentation and Reconstruction from 2D Late-Gadolinium Enhanced Magnetic Resonance Images	MICCAI	2014	Yes stated or possible to calculate	No	Not considered	No preprocessing	No augmentation	Not used	There is no risk for dependence between train and test data	Done on train set	Not used	Yes	No baselines/Nothing to tune	Yes	Test set	No
RW4	203	Deep Random Walk for Drusen Segmentation from Fundus Images	MICCAI	2018	Yes stated or possible to calculate	Yes	Not considered	No preprocessing	Done on train data	Not used	Not used	Not used	Not used	Yes	No	No		No
RW4	288	Learning Tumor-Induced Deformations to Improve Tumor-Bearing Brain MR Segmentation	MICCAI	2022	Not clearly stated	Yes	Not considered	No preprocessing	Done on the entire data before split	Not used	Not used	Not used	Not used	No	No	No		Yes
RW4	32	A Randomized Ensemble Approach to Industrial CT Segmentation	ICCV	2015	Yes stated or possible to calculate	No	Not considered	No preprocessing	No augmentation	Not used	There is no risk for dependence between train and test data	Not used	Not used	Yes	No baselines/Nothing to tune	Not clear/Insufficiently described	Not clear/Insufficiently described	No
RW4	296	Lesion-Aware Dynamic Kernel for Polyp Segmentation	MICCAI	2022	Referenced	Yes	Not considered	No preprocessing	Done on train data	Not used	Not used	Not used	Not used	Yes	No	No		Yes
RW4	50	Super-Trajectory for Video Segmentation	ICCV	2017	Referenced	Yes	Not considered	No preprocessing	No augmentation	Not used	There is no risk for dependence between train and test data	Test set is included	Not used	No	No baselines/Nothing to tune	No		No
RW4	207	Multiscale Network Followed Network Model for Retinal Vessel Segmentation	MICCAI	2018	Referenced	Yes	Not considered	Preprocessing separately after splitting	No augmentation	Not used	Not used	Not used	Not used	Yes	No	No		No
RW4	119	Deep Feature Learning for Knee Cartilage Segmentation Using a Triplanar Convolutional Neural Network	MICCAI	2013	Referenced	Yes	Not considered	Preprocessing separately after splitting	No augmentation	Not used	There is risk for dependence between train and test data	Done on train set	Not used	Yes	No baselines/Nothing to tune	Yes	Not clear/Insufficiently described	No
RW4	268	Reciprocal Learning for Semi-supervised Segmentation	MICCAI	2021	Referenced	Yes	Not considered	Preprocessing separately after splitting	Not clear/Insufficiently described	Not used	Not used	Not used	Not used	No	Yes thoroughly	No		Yes
RW4	261	A Spatial Guided Self-supervised Clustering Network for Medical Image Segmentation	MICCAI	2021	Referenced	Yes	Not considered	No preprocessing	No augmentation	Not used	Not used	Not used	Not used	Yes	No baselines/Nothing to tune	No		No
RW4	43	Illuminating Pedestrians via Simultaneous Detection and Segmentation	ICCV	2017	Yes stated or possible to calculate	Yes	Not considered	No preprocessing	No augmentation	Not used	Not used	Not used	Not used	Yes	Not clear/Insufficiently described	No		No
RW4	46	Universal Adversarial Perturbations Against Semantic Image Segmentation	ICCV	2017	Yes stated or possible to calculate	Yes	Considered	No preprocessing	No augmentation	Not used	Not used	Not used	Not used	Yes	No baselines/Nothing to tune	No		No
RW4	71	Dynamic Multi-Scale Filters for Semantic Segmentation	ICCV	2019	Referenced	Yes	Not considered	No preprocessing	Done on train data	Not used	Not used	Test set is included	Not used	No	Not clear/Insufficiently described	No		Yes
RW4	211	Tumor-Aware, Adversarial Domain Adaptation from CT to MRI for Lung Cancer Segmentation	MICCAI	2018	Yes stated or possible to calculate	Yes	Not considered	Preprocessing separately after splitting	No augmentation	Not used	There is no risk for dependence between train and test data	Done on train set	Not used	Yes	No	Yes	Test set	Yes
RW4	2	Proportion Priors for Image Sequence Segmentation	ICCV	2013	Yes stated or possible to calculate	Yes	Not considered	Preprocessing separately after splitting	No augmentation	Not used	Not used	Not clear/Insufficiently described	Not used	Not clear	No	No		No
RW4	217	Bridging the Gap Between 2D and 3D Organ Segmentation with Volumetric Fusion Net	MICCAI	2018	Not clearly stated	Yes	Considered	Preprocessing separately after splitting	Done on train data	Not used	There is no risk for dependence between train and test data	Not clear/Insufficiently described	Not used	Yes	No	Yes	Independent test set	No
RW3	110	Higher-Order CRF Tumor Segmentation with Discriminant Manifold Potentials	MICCAI	2013	Yes stated or possible to calculate	No	Not considered	Not clear	No augmentation	Not used	There is no risk for dependence between train and test data	Not used	Not used	Not clear	No	Yes	Test set	No
RW3	202	Deep Supervision with Additional Labels for Retinal Vessel Segmentation Task	MICCAI	2018	Yes stated or possible to calculate	Yes	Not considered	Preprocessing the entire data but no risk of leakage	Done on train data	Not used	Not used	Not used	Not used	Yes	No	No		No
RW3	279	Learning with Noise: Mask-Guided Attention Model for Weakly Supervised Nuclei Segmentation	MICCAI	2021	Yes stated or possible to calculate	Yes	Not considered	Not clear	Not clear/Insufficiently described	Not clear	Not clear/Insufficiently described	Not used	Not used	Not clear	No	Yes	Test set	Yes
RW3	153	Minimum S-Excess Graph for Segmenting and Tracking Multiple Borders with HMM	MICCAI	2015	Yes stated or possible to calculate	No	Not considered	Preprocessing the entire data but no risk of leakage	No augmentation	Not used	There is risk for dependence between train and test data	Not used	Not used	No	No	Yes	Not clear/Insufficiently described	No
RW3	169	3D U-Net: Learning Dense Volumetric Segmentation from Sparse Annotation	MICCAI	2016	Yes stated or possible to calculate	No	Not considered	Preprocessing the entire data before split with risk of leakage	Done on the entire data before split	Not used	Not used	Not used	Not used	No	No baselines/Nothing to tune	No		No
RW3	254	Endoscopic Polyp Segmentation Using a Hybrid 2D/3D CNN	MICCAI	2020	Yes stated or possible to calculate	Yes	Not considered	No preprocessing	No augmentation	Not used	There is no risk for dependence between train and test data	Not used	Not used	Yes	No	No		No
RW3	65	Unsupervised Microvascular Image Segmentation Using an Active Contours Mimicking Neural Network	ICCV	2019	Yes stated or possible to calculate	Yes	Not considered	Preprocessing the entire data before split with risk of leakage	No augmentation	Not used	There is risk for dependence between train and test data	Not clear/Insufficiently described	Not used	No	Yes thoroughly	No		Yes
RW3	233	Segmentation of Vessels in Ultra High Frequency Ultrasound Sequences Using Contextual Memory	MICCAI	2019	Yes stated or possible to calculate	Yes	Considered	Preprocessing separately after splitting	Done on train data	Not used	There is no risk for dependence between train and test data	Not used	Not used	Yes	No	Yes	Test set	No
RW3	12	Symbiotic Segmentation and Part Localization for Fine-Grained Categorization	ICCV	2013	Yes stated or possible to calculate	Yes	Not considered	Not clear	Not clear/Insufficiently described	Not used	Not used	Not used	Not used	Not clear	No	No		No
RW3	247	CNN-GCN Aggregation Enabled Boundary Regression for Biomedical Image Segmentation	MICCAI	2020	Yes stated or possible to calculate	Yes	Not considered	Preprocessing the entire data but no risk of leakage	Done on train data	Not used	Not used	Done on train set	Not used	Yes	No	No		No
RW3	26	Weakly Supervised Graph Based Semantic Segmentation by Learning Communities of Image-Parts	ICCV	2015	Yes stated or possible to calculate	Yes	Not considered	Not clear	No augmentation	Not used	Not used	Not used	Not used	Not clear	No	No		No
RW3	173	Deep Neural Networks for Fast Segmentation of 3D Medical Images	MICCAI	2016	Yes stated or possible to calculate	Yes	Not considered	Preprocessing the entire data but no risk of leakage	No augmentation	Not used	There is no risk for dependence between train and test data	Not used	Not used	Yes	No	No		No
RW3	28	Semantic Segmentation with Object Clique Potential	ICCV	2015	Yes stated or possible to calculate	Yes	Not considered	Preprocessing separately after splitting	Done on train data	Not used	Not used	Done on train set	Not used	Yes	No	No		No
RW3	230	Weakly Supervised Cell Instance Segmentation by Propagating from Detection Response	MICCAI	2019	Not clearly stated	Yes	Not considered	Not clear	No augmentation	Not used	Not clear/Insufficiently described	Not used	Not used	Not clear	No	No		Yes
RW3	137	Myocardial Infarct Segmentation and Reconstruction from 2D Late-Gadolinium Enhanced Magnetic Resonance Images	MICCAI	2014	Yes stated or possible to calculate	No	Not considered	Not clear	No augmentation	Not used	Not clear/Insufficiently described	Not used	Not used	Not clear	No	Yes	Test set	No
RW3	229	Adversarial Optimization for Joint Registration and Segmentation in Prostate CT Radiotherapy	MICCAI	2019	Yes stated or possible to calculate	No	Not considered	Preprocessing the entire data but no risk of leakage	No augmentation	Not used	There is no risk for dependence between train and test data	Not used	Not used	Yes	No	Yes	Test set	No
RW3-X	288	Learning Tumor-Induced Deformations to Improve Tumor-Bearing Brain MR Segmentation	MICCAI	2022														Yes
RW3-X	135	Sparse Appearance Learning Based Automatic Coronary Sinus Segmentation in CTA	MICCAI	2014
RW3	296	Lesion-Aware Dynamic Kernel for Polyp Segmentation	MICCAI	2022	Yes stated or possible to calculate	Yes	Not considered	Preprocessing the entire data but no risk of leakage	Done on train data	Not used	Not used	Not used	Not used	Yes	No	No		Yes
RW3	85	Video Object Segmentation with Dynamic Memory Networks and Adaptive Object Alignment	ICCV	2021	Yes stated or possible to calculate	Yes	Not considered	Not clear	No augmentation	Not used	There is no risk for dependence between train and test data	Not used	Not used	Not clear	No	No		Yes
RW3	207	Multiscale Network Followed Network Model for Retinal Vessel Segmentation	MICCAI	2018	Yes stated or possible to calculate	Yes	Not considered	Preprocessing separately after splitting	No augmentation	Not used	Not used	Not used	Not used	Yes	No	No		No
RW3-X	20	TransCut: Transparent Object Segmentation from a Light-Field Image	ICCV	2015
RW3	268	Reciprocal Learning for Semi-supervised Segmentation	MICCAI	2021	Yes stated or possible to calculate	Yes	Not considered	Preprocessing the entire data but no risk of leakage	Done on train data	Not used	There is no risk for dependence between train and test data	Not used	Not used	Yes	No	No		Yes
RW3-X	111	Automated Segmentation and Geometrical Modeling of the Tricuspid Aortic Valve in 3D Echocardiographic Images	MICCAI	2013
RW3	43	Illuminating Pedestrians via Simultaneous Detection and Segmentation	ICCV	2017	Yes stated or possible to calculate	Yes	Not considered	Not clear	Done on train data	Not used	There is risk for dependence between train and test data	Not used	Not used	No	No	No		No
RW3	130	Multi-atlas Spectral PatchMatch: Application to Cardiac Image Segmentation	MICCAI	2014	Yes stated or possible to calculate	Yes	Considered	Not clear	No augmentation	Not used	Not clear/Insufficiently described	Not used	Not used	Not clear	No	No		No
RW3	71	Dynamic Multi-Scale Filters for Semantic Segmentation	ICCV	2019	Yes stated or possible to calculate	Yes	Not considered	Preprocessing the entire data but no risk of leakage	Done on the entire data before split	Not used	Not used	Not clear/Insufficiently described	Not used	Not clear	Yes partially	No		No
RW3	182	Automatic 3D Cardiovascular MR Segmentation with Densely-Connected Volumetric ConvNets	MICCAI	2017	Yes stated or possible to calculate	Yes	Not considered	Preprocessing the entire data before split with risk of leakage	Done on train data	Not used	There is no risk for dependence between train and test data	Not used	Not used	No	No	Yes	Not clear/Insufficiently described	No
RW3-X	2	Proportion Priors for Image Sequence Segmentation	ICCV	2013
RW3-X	221	Impact of Adversarial Examples on Deep Learning Models for Biomedical Image Segmentation	MICCAI	2019
RW1	56	Deep Dual Learning for Semantic Image Segmentation	ICCV	2017	Yes stated or possible to calculate	Yes	Not considered	No preprocessing	No augmentation	Not used	Not used	Not used	Not used	Yes	No	No		No
RW1	41	Curriculum Domain Adaptation for Semantic Segmentation of Urban Scenes	ICCV	2017	Yes stated or possible to calculate	Yes	Not considered	No preprocessing	No augmentation	Not used	Not clear/Insufficiently described	Not used	Not used	Not clear	No	No		Yes
RW1	242	Brain Tumor Segmentation with Missing Modalities via Latent Multi-source Correlation Representation	MICCAI	2020	Yes stated or possible to calculate	Yes	Not considered	Preprocessing the entire data but no risk of leakage	No augmentation	Not used	Not clear/Insufficiently described	Not used	Not used	Yes	No	No		No
RW1-X	150	Positive Delta Detection for Alpha Shape Segmentation of 3D Ultrasound Images of Pathologic Kidneys	MICCAI	2015
RW1	78	InstaBoost: Boosting Instance Segmentation via Probability Map Guided Copy-Pasting	ICCV	2019	Some are stated and some are referenced	Yes	Not considered	No preprocessing	No augmentation	Not used	Not used	Not used	Not used	Not clear	Yes partially	No		Yes
RW1	270	MT-UDA: Towards Unsupervised Cross-modality Medical Image Segmentation with Limited Source Labels	MICCAI	2021	Yes stated or possible to calculate	Yes	Not considered	Not clear	No augmentation	Not used	There is no risk for dependence between train and test data	Not used	Not used	Yes	No	No		No
RW1	15	Segmentation Driven Object Detection with Fisher Vectors	ICCV	2013	Not clearly stated	Yes	Not considered	No preprocessing	No augmentation	Not used	Not used	Not used	Not used	Not clear	No	No		No
RW1	186	Towards Image-Guided Pancreas and Biliary Endoscopy: Automatic Multi-organ Segmentation on Abdominal CT with Dense Dilated Networks	MICCAI	2017	Yes stated or possible to calculate	Yes	Not considered	No preprocessing	No augmentation	Not used	There is no risk for dependence between train and test data	Not used	Done correctly within the loop	Yes	No	Yes	Cross-validation or other resampling methods	No
RW1	223	Integrating Cross-modality Hallucinated MRI with CT to Aid Mediastinal Lung Tumor Segmentation	MICCAI	2019	Yes stated or possible to calculate	No	Not considered	No preprocessing	No augmentation	Not used	Not clear/Insufficiently described	Not used	Not used	Yes	No	Yes	Not clear/Insufficiently described	No
RW1	201	Accurate Weakly-Supervised Deep Lesion Segmentation Using Large-Scale Clinical Annotations: Slice-Propagated 3D Mask Generation from 2D RECIST	MICCAI	2018	Yes stated or possible to calculate	Yes	Not considered	Preprocessing the entire data but no risk of leakage	No augmentation	Not used	There is no risk for dependence between train and test data	Not used	Not used	Yes	No	Yes	Not clear/Insufficiently described	No
RW1	36	Motion Trajectory Segmentation via Minimum Cost Multicuts	ICCV	2015	Referenced	Yes	Not considered	No preprocessing	No augmentation	Not used	There is no risk for dependence between train and test data	Not used	Not used	Yes	Not clear/Insufficiently described	No		No
RW1	274	Modality Completion via Gaussian Process Prior Variational Autoencoders for Multi-modal Glioma Segmentation	MICCAI	2021	Yes stated or possible to calculate	Yes	Not considered	No preprocessing	No augmentation	Not used	Not clear/Insufficiently described	Not used	Not used	Not clear	No	Yes	Not clear/Insufficiently described	Yes
RW1	260	M-SEAM-NAM: Multi-instance Self-supervised Equivalent Attention Mechanism with Neighborhood Affinity Module for Double Weakly Supervised Segmentation of COVID-19	MICCAI	2021	Yes stated or possible to calculate	No	Not considered	Preprocessing the entire data but no risk of leakage	Done on train data	Not used	There is no risk for dependence between train and test data	Not clear/Insufficiently described	Not used	Yes	No	Yes	Test set	Yes
RW1	257	Learning High-Resolution and Efficient Non-local Features for Brain Glioma Segmentation in MR Images	MICCAI	2020	Yes stated or possible to calculate	Yes	Not considered	Preprocessing the entire data but no risk of leakage	Done on train data	Not used	There is no risk for dependence between train and test data	Not used	Not clear/Insufficiently described	Not clear	No	No		No
RW1	90	Semi-Supervised Semantic Segmentation with Pixel-Level Contrastive Learning from a Class-wise Memory Bank	ICCV	2021	Yes stated or possible to calculate	Yes	Not considered	No preprocessing	Not clear/Insufficiently described	Not used	There is risk for dependence between train and test data	Not used	Not used	Not clear	No	No		Yes
RW1	114	Learning from Multiple Experts with Random Forests: Application to the Segmentation of the Midbrain in 3D Ultrasound	MICCAI	2013	Yes stated or possible to calculate	No	Not considered	No preprocessing	No augmentation	Not used	Not clear/Insufficiently described	Not used	Not used	Not clear	No	Yes	Cross-validation or other resampling methods	No
RW1	101	Automated Segmentation of CBCT Image Using Spiral CT Atlases and Convex Optimization	MICCAI	2013	Yes stated or possible to calculate	No	Considered	No preprocessing	No augmentation	Not used	There is no risk for dependence between train and test data	Not clear/Insufficiently described	Not clear/Insufficiently described	Yes	Not clear/Insufficiently described	Yes	Test set	No
RW1	158	Learning to Segment: Training Hierarchical Segmentation under a Topological Loss	MICCAI	2015	Yes stated or possible to calculate	Yes	Not considered	No preprocessing	No augmentation	Not used	Not used	Done on train set	Done correctly within the loop	Yes	No baselines/Nothing to tune	No		Yes
RW1	237	A Joint 3D+2D Fully Convolutional Framework for Subcortical Segmentation	MICCAI	2019	Yes stated or possible to calculate	Yes	Not considered	Not clear	No augmentation	Not used	Not clear/Insufficiently described	Not used	Done correctly within the loop	Yes	No	Yes	Not clear/Insufficiently described	No
RW1	61	Fine-Grained Segmentation Networks: Self-Supervised Segmentation for Improved Long-Term Visual Localization	ICCV	2019	Yes stated or possible to calculate	Yes	Not considered	No preprocessing	No augmentation	Not used	There is risk for dependence between train and test data	Not used	Not used	Not clear	No	No		Yes
RW1	196	Automatic Liver Segmentation Using an Adversarial Image-to-Image Network	MICCAI	2017	Yes stated or possible to calculate	No	Not considered	No preprocessing	No augmentation	Not used	There is no risk for dependence between train and test data	Not used	Not used	Yes	Yes partially	Yes	Independent test set	No
RW1	99	Multi-View Radar Semantic Segmentation	ICCV	2021	Yes stated or possible to calculate	Yes	Not considered	Not clear	No augmentation	Not used	Not clear/Insufficiently described	Not clear/Insufficiently described	Not used	Yes	Not clear/Insufficiently described	No		Yes
RW1	97	Robust Trust Region for Weakly Supervised Segmentation	ICCV	2021	Referenced	Yes	Not considered	No preprocessing	No augmentation	Not used	Not used	Done on train set	Not used	Yes	No	No		Yes
RW1	248	Multi-task Dynamic Transformer Network for Concurrent Bone Segmentation and Large-Scale Landmark Localization with Dental CBCT	MICCAI	2020	Yes stated or possible to calculate	No	Not considered	No preprocessing	Done on train data	Not used	There is no risk for dependence between train and test data	Not used	Not used	Yes	Yes partially	Yes	Test set	No
RW1	117	Registration of Free-Breathing 3D+t Abdominal Perfusion CT Images via Co-segmentation	MICCAI	2013	Yes stated or possible to calculate	No	Not considered	No preprocessing	No augmentation	Not used	There is risk for dependence between train and test data	Not used	Not used	Not clear	No	Yes	Not clear/Insufficiently described	No
RW1	171	Topology Aware Fully Convolutional Networks for Histology Gland Segmentation	MICCAI	2016	Yes stated or possible to calculate	Yes	Not considered	No preprocessing	Done on the entire data before split	Not used	Not used	Not clear/Insufficiently described	Not used	Yes	Yes partially	Yes	Not clear/Insufficiently described	No
RW1	255	Unsupervised Learning for CT Image Segmentation via Adversarial Redrawing	MICCAI	2020	Yes stated or possible to calculate	Yes	Not considered	No preprocessing	No augmentation	Not used	Not clear/Insufficiently described	Not clear/Insufficiently described	Not clear/Insufficiently described	Not clear	No	Yes	Not clear/Insufficiently described	No
RW1-X	67	Convex Shape Prior for Multi-Object Segmentation Using a Single Level Set Function	ICCV	2019
RW1-X	112	Fast Globally Optimal Segmentation of 3D Prostate MRI with Axial Symmetry Prior	MICCAI	2013
RW1	239	Conditional Segmentation in Lieu of Image Registration	MICCAI	2019	Yes stated or possible to calculate	No	Not considered	Not clear	No augmentation	Not used	Not clear/Insufficiently described	Not used	Not clear/Insufficiently described	Not clear	Not clear/Insufficiently described	Yes	Cross-validation or other resampling methods	No
RW5	200	Autofocus Layer for Semantic Segmentation	MICCAI	2018	Yes stated or possible to calculate	Yes	Not considered	Preprocessing the entire data but no risk of leakage	No augmentation	Not used	There is no risk for dependence between train and test data	Not clear/Insufficiently described	Not used	Not clear	No	No		Yes
RW5	226	SegNAS3D: Network Architecture Search with Derivative-Free Global Optimization for 3D Image Segmentation	MICCAI	2019	Yes stated or possible to calculate	No	Not considered	Preprocessing the entire data but no risk of leakage	Done on train data	Not used	There is no risk for dependence between train and test data	Not clear/Insufficiently described	Done incorrectly outside the loop	No	No	Yes	Cross-validation or other resampling methods	No
RW5	289	Semi-supervised Histological Image Segmentation via Hierarchical Consistency Enforcement	MICCAI	2022	Yes stated or possible to calculate	Yes	Not considered	Preprocessing separately after splitting	Done on train data	Not used	Not used	Not clear/Insufficiently described	Not used	Not clear	No	No		No
RW5	123	Bone Tumor Segmentation on Bone Scans Using Context Information and Random Forests	MICCAI	2014	Yes stated or possible to calculate	No	Considered	Not clear	No augmentation	Not used	Not used	Not clear/Insufficiently described	Not used	Not clear	No	Yes	Test set	No
RW5	77	YOLACT: Real-Time Instance Segmentation	ICCV	2019	No	Yes	Not considered	No preprocessing	Not clear/Insufficiently described	Not used	Not used	Not clear/Insufficiently described	Not used	Not clear	No	No		Yes
RW5	280	Domain Specific Convolution and High Frequency Reconstruction Based Unsupervised Domain Adaptation for Medical Image Segmentation	MICCAI	2022	Yes stated or possible to calculate	Yes	Not considered	Preprocessing the entire data but no risk of leakage	No augmentation	Not used	Not used	Not clear/Insufficiently described	Not used	Not clear	No	Yes	Independent test set	Yes
RW5	258	A Semi-supervised Joint Network for Simultaneous Left Ventricular Motion Tracking and Segmentation in 4D Echocardiography	MICCAI	2020	Yes stated or possible to calculate	Yes	Considered	Preprocessing the entire data but no risk of leakage	Not clear/Insufficiently described	Not used	There is no risk for dependence between train and test data	Not clear/Insufficiently described	Not used	Not clear	No	Yes	Test set	No
RW5	49	SceneNet RGB-D: Can 5M Synthetic Images Beat Generic ImageNet Pre-training on Indoor Segmentation?	ICCV	2017	Yes stated or possible to calculate	Yes	Not clear/Insufficiently described	No preprocessing	No augmentation	Not used	Not clear/Insufficiently described	Not clear/Insufficiently described	Not used	Not clear	No	No		Yes
RW5	95	Domain Adaptive Semantic Segmentation with Self-Supervised Depth Estimation	ICCV	2021	Yes stated or possible to calculate	Yes	Not considered	Preprocessing the entire data but no risk of leakage	Not clear/Insufficiently described	Not used	Not used	Not clear/Insufficiently described	Not used	Not clear	No	No		Yes
RW5	161	Dynamically Balanced Online Random Forests for Interactive Scribble-Based Segmentation	MICCAI	2016	Yes stated or possible to calculate	Yes	Considered	Not clear	No augmentation	Not used	Not used	Not clear/Insufficiently described	Not clear/Insufficiently described	Not clear	No	Yes	Cross-validation or other resampling methods	Yes
RW5	75	Event-Based Motion Segmentation by Motion Compensation	ICCV	2019	Referenced	Yes	Not considered	No preprocessing	No augmentation	Not used	Not clear/Insufficiently described	Not clear/Insufficiently described	Not used	Not clear	No	No		No
RW5	276	Multi-phase Liver Tumor Segmentation with Spatial Aggregation and Uncertain Region Inpainting	MICCAI	2021	Yes stated or possible to calculate	No	Considered	Not clear	Done on train data	Not used	There is no risk for dependence between train and test data	Not clear/Insufficiently described	Not clear/Insufficiently described	Not clear	No	No		No
RW5-X	164	Orientation-Sensitive Overlap Measures for the Validation of Medical Image Segmentations	MICCAI	2016
RW5	287	Atlas-Based Semantic Segmentation of Prostate Zones	MICCAI	2022	Yes stated or possible to calculate	Yes	Not considered	Not clear	Done on train data	Not used	There is no risk for dependence between train and test data	Not clear/Insufficiently described	Not used	Not clear	No	Yes	Independent test set	Yes
RW5	144	Automated Segmentation of Surgical Motion for Performance Analysis and Feedback	MICCAI	2015	Yes stated or possible to calculate	No	Not considered	Not clear	No augmentation	Not used	There is no risk for dependence between train and test data	Done on train set	Not used	Not clear	No	No		No
RW5	151	Graph-Based Motion-Driven Segmentation of the Carotid Atherosclerotique Plaque in 2D Ultrasound Sequences	MICCAI	2015	Yes stated or possible to calculate	No	Not considered	Not clear	No augmentation	Not used	There is no risk for dependence between train and test data	Not clear/Insufficiently described	Not clear/Insufficiently described	Not clear	No	Yes	Cross-validation or other resampling methods	No
RW5	299	DeepPyramid: Enabling Pyramid View and Deformable Pyramid Reception for Semantic Segmentation in Cataract Surgery Videos	MICCAI	2022	Yes stated or possible to calculate	Yes	Not considered	No preprocessing	Done on train data	Not used	There is no risk for dependence between train and test data	Not clear/Insufficiently described	Not used	Not clear	Yes partially	No		Yes
RW5	73	VV-Net: Voxel VAE Net With Group Convolutions for Point Cloud Segmentation	ICCV	2019	Referenced	Yes	Not considered	No preprocessing	No augmentation	Not used	Not clear/Insufficiently described	Not clear/Insufficiently described	Not used	Not clear	No	No		Yes
RW5	30	Semi-Supervised Normalized Cuts for Image Segmentation	ICCV	2015	Referenced	Yes	Not considered	No preprocessing	No augmentation	Not used	Not clear/Insufficiently described	Not clear/Insufficiently described	Not used	Not clear	No	No		No
RW5	86	RPVNet: A Deep and Efficient Range-Point-Voxel Fusion Network for LiDAR Point Cloud Segmentation	ICCV	2021	Yes stated or possible to calculate	Yes	Considered	No preprocessing	Done on train data	Not used	There is no risk for dependence between train and test data	Not clear/Insufficiently described	Not used	Not clear	No	No		No
RW5	218	Bayesian VoxDRN: A Probabilistic Deep Voxelwise Dilated Residual Network for Whole Heart Segmentation from 3D MR Images	MICCAI	2018	Yes stated or possible to calculate	Yes	Not considered	Preprocessing separately after splitting	Done on train data	Not used	There is no risk for dependence between train and test data	Not clear/Insufficiently described	Not used	Not clear	No	No		No
RW5	91	Learning with Noisy Labels for Robust Point Cloud Segmentation	ICCV	2021	Yes stated or possible to calculate	Yes	Not considered	No preprocessing	No augmentation	Not used	Not clear/Insufficiently described	Not clear/Insufficiently described	Not used	Not clear	Yes partially	No		Yes
RW5	283	Thoracic Lymph Node Segmentation in CT Imaging via Lymph Node Station Stratification and Size Encoding	MICCAI	2022	Yes stated or possible to calculate	Yes	Not considered	No preprocessing	Done on train data	Not used	There is no risk for dependence between train and test data	Not clear/Insufficiently described	Not clear/Insufficiently described	Not clear	No	Yes	Independent test set	No
RW5	82	Pseudo-mask Matters in Weakly-supervised Semantic Segmentation	ICCV	2021	Yes stated or possible to calculate	Yes	Not considered	No preprocessing	Done on train data	Not used	Not used	Not clear/Insufficiently described	Not used	Not clear	No	No		Yes
RW5	277	Self-supervised Correction Learning for Semi-supervised Biomedical Image Segmentation	MICCAI	2021	Yes stated or possible to calculate	Yes	Not considered	Preprocessing the entire data but no risk of leakage	Done on train data	Not used	Not used	Not clear/Insufficiently described	Not used	Not clear	No	No		Yes
RW5-X	170	Multivariate Mixture Model for Cardiac Segmentation from Multi-Sequence MRI	MICCAI	2016
RW5	55	Pixel-Level Matching for Video Object Segmentation Using Convolutional Neural Networks	ICCV	2017	Yes stated or possible to calculate	Yes	Not considered	No preprocessing	Not clear/Insufficiently described	Not used	Not clear/Insufficiently described	Not clear/Insufficiently described	Not used	Not clear	No	Yes	Test set	No
RW5	278	Hepatocellular Carcinoma Segmentation from Digital Subtraction Angiography Videos Using Learnable Temporal Difference	MICCAI	2021	Yes stated or possible to calculate	No	Not considered	No preprocessing	Done on train data	Not used	There is no risk for dependence between train and test data	Not clear/Insufficiently described	Not used	Not clear	No	Yes	Test set	No
RW5	128	Coupled Sparse Dictionary for Depth-Based Cup Segmentation from Single Color Fundus Image	MICCAI	2014	Yes stated or possible to calculate	Yes	Not considered	Preprocessing the entire data but no risk of leakage	No augmentation	Not used	Not used	Not clear/Insufficiently described	Not clear/Insufficiently described	Not clear	No	Yes	Test set	No
RW5	232	A Deep Learning Design for Improving Topology Coherence in Blood Vessel Segmentation	MICCAI	2019	Yes stated or possible to calculate	Yes	Not considered	No preprocessing	Done on train data	Not used	Not used	Done on train set	Not used	Yes	Yes thoroughly	No		Yes
RW5	264	SGNet: Structure-Aware Graph-Based Network for Airway Semantic Segmentation	MICCAI	2021	Yes stated or possible to calculate	Yes	Not considered	Preprocessing the entire data but no risk of leakage	Done on train data	Not used	There is no risk for dependence between train and test data	Not clear/Insufficiently described	Not used	Not clear	No	Yes	Test set	No
RW5	40	Semi Supervised Semantic Segmentation Using Generative Adversarial Network	ICCV	2017	Yes stated or possible to calculate	Yes	Not considered	No preprocessing	No augmentation	Not used	Not used	Not clear/Insufficiently described	Not used	Not clear	No	No		No
RW5	174	Iterative Multi-domain Regularized Deep Learning for Anatomical Structure Detection and Segmentation from Ultrasound Images	MICCAI	2016	Yes stated or possible to calculate	No	Not considered	No preprocessing	No augmentation	Not used	Not used	Not clear/Insufficiently described	Not used	Not clear	No	No		No
RW5	18	Semi-supervised Learning for Large Scale Image Cosegmentation	ICCV	2013	Yes stated or possible to calculate	Yes	Not considered	No preprocessing	No augmentation	Not used	Not used	Not clear/Insufficiently described	Not used	Not clear	No	No		No
RW5-X	124	Application-Driven MRI: Joint Reconstruction and Segmentation from Undersampled MRI Data	MICCAI	2014
RW5	265	A Hybrid Attention Ensemble Framework for Zonal Prostate Segmentation	MICCAI	2021	Yes stated or possible to calculate	Yes	Not considered	Not clear	No augmentation	Not used	There is no risk for dependence between train and test data	Not clear/Insufficiently described	Not used	Not clear	No	Yes	Test set	No
RW5	294	RT-DNAS: Real-Time Constrained Differentiable Neural Architecture Search for 3D Cardiac Cine MRI Segmentation	MICCAI	2022	Yes stated or possible to calculate	Yes	Not considered	No preprocessing	No augmentation	Not used	There is no risk for dependence between train and test data	Done on train/validation set	Not clear/Insufficiently described	Not clear	No	Yes	Cross-validation or other resampling methods	No
RW5	251	KiU-Net: Towards Accurate Segmentation of Biomedical Images Using Over-Complete Representations	MICCAI	2020	Yes stated or possible to calculate	No	Not considered	Preprocessing the entire data but no risk of leakage	No augmentation	Not used	There is no risk for dependence between train and test data	Not clear/Insufficiently described	Not clear/Insufficiently described	Not clear	No	Yes	Cross-validation or other resampling methods	Yes
RW5	3	Video Segmentation by Tracking Many Figure-Ground Segments	ICCV	2013	Referenced	Yes	Not considered	No preprocessing	No augmentation	Not used	Not clear/Insufficiently described	Not clear/Insufficiently described	Not used	Not clear	No	No		No
RW5	241	Feature Preserving Smoothing Provides Simple and Effective Data Augmentation for Medical Image Segmentation	MICCAI	2020	Yes stated or possible to calculate	Yes	Not considered	Not clear	Done on train data	Not used	There is no risk for dependence between train and test data	Not clear/Insufficiently described	Not used	Not clear	Not clear/Insufficiently described	No		No
RW5	227	Brain Segmentation from k-Space with End-to-End Recurrent Attention Network	MICCAI	2019	Yes stated or possible to calculate	No	Not considered	Not clear	No augmentation	Not used	There is no risk for dependence between train and test data	Not clear/Insufficiently described	Not used	Not clear	No	No		No
RW5-X	272	Towards Robust General Medical Image Segmentation	MICCAI	2021
RW5	148	Segmentation of Infant Hippocampus Using Common Feature Representations Learned for Multimodal Longitudinal Data	MICCAI	2015	Yes stated or possible to calculate	No	Not considered	Preprocessing the entire data but no risk of leakage	No augmentation	Not used	There is no risk for dependence between train and test data	Not used	Not used	Yes	No	No	Test set	No
RW5	246	Weakly-Supervised Nucleus Segmentation Based on Point Annotations: A Coarse-to-Fine Self-Stimulated Learning Strategy	MICCAI	2020	Not clearly stated	Yes	Not considered	No preprocessing	Not clear/Insufficiently described	Not used	Not used	Not used	Not clear/Insufficiently described	Not clear	No	Yes	Test set	Yes
RW5	205	A No-Reference Quality Metric for Retinal Vessel Tree Segmentation	MICCAI	2018	Yes stated or possible to calculate	Yes	Not considered	No preprocessing	No augmentation	Not used	There is no risk for dependence between train and test data	Not used	Not used	Yes	Yes partially	Yes	Independent test set	No
RW5	98	Mutual-Complementing Framework for Nuclei Detection and Segmentation in Pathology Image	ICCV	2021	Yes stated or possible to calculate	Yes	Not considered	Not clear	Not clear/Insufficiently described	Not used	Not used	Not used	Not used	Not clear	No	No		No
RW5	54	Dynamics Enhanced Multi-camera Motion Segmentation from Unsynchronized Videos	ICCV	2017	No	Yes	Not considered	No preprocessing	No augmentation	Not used	There is no risk for dependence between train and test data	Not used	Not used	Yes	No	No		No
RW5	51	3D Graph Neural Networks for RGBD Semantic Segmentation	ICCV	2017	Yes stated or possible to calculate	Yes	Not considered	Preprocessing the entire data but no risk of leakage	No augmentation	Not used	Not used	Done on train/validation set	Not used	Yes	No	No		No
RW5	286	Discrepancy-Based Active Learning for Weakly Supervised Bleeding Segmentation in Wireless Capsule Endoscopy Images	MICCAI	2022	Yes stated or possible to calculate	Yes	Not considered	Preprocessing the entire data but no risk of leakage	Not clear/Insufficiently described	Not used	Not used	Not used	Not clear/Insufficiently described	Not clear	No	Yes	Test set	Yes
RW5	59	Predicting Deeper into the Future of Semantic Segmentation	ICCV	2017	Yes stated or possible to calculate	Yes	Not considered	Preprocessing the entire data but no risk of leakage	No augmentation	Not used	There is no risk for dependence between train and test data	Not used	Not used	Yes	No	No		No
RW5	282	Attentive Symmetric Autoencoder for Brain MRI Segmentation	MICCAI	2022	Yes stated or possible to calculate	Yes	Not considered	Preprocessing the entire data but no risk of leakage	Done on train data	Not used	There is no risk for dependence between train and test data	Not used	Not used	Yes	No	No		No
RW5	13	Image Co-segmentation via Consistent Functional Maps	ICCV	2013	Yes stated or possible to calculate	Yes	Not considered	No preprocessing	No augmentation	Not used	Not used	Not used	Not used	Yes	No	No		Yes
RW5	185	Segmentation of Cortical and Subcortical Multiple Sclerosis Lesions Based on Constrained Partial Volume Modeling	MICCAI	2017	Yes stated or possible to calculate	No	Not considered	Not clear	No augmentation	Not used	Not clear/Insufficiently described	Done on train/validation set	Not used	Not clear	No baselines/Nothing to tune	Yes	Other	No
RW5	193	Concurrent Segmentation and Localization for Tracking of Surgical Instruments	MICCAI	2017	Yes stated or possible to calculate	Yes	Not considered	No preprocessing	Done on train data	Not used	There is risk for dependence between train and test data	Not used	Not used	No	No	No		No
RW5	163	Prior-Based Coregistration and Cosegmentation	MICCAI	2016	Yes stated or possible to calculate	Yes	Not considered	No preprocessing	No augmentation	Not used	There is no risk for dependence between train and test data	Not clear/Insufficiently described	Not clear/Insufficiently described	Not clear	No	Yes	Not clear/Insufficiently described	No
RW5	37	Segment-Phrase Table for Semantic Segmentation, Visual Entailment and Paraphrasing	ICCV	2015	Not clearly stated	Yes	Not considered	No preprocessing	No augmentation	Not used	Not used	Not used	Not used	Yes	No	No		No
RW5	172	Feature Sensitive Label Fusion with Random Walker for Atlas-Based Image Segmentation	MICCAI	2016	Yes stated or possible to calculate	Yes	Not considered	Not clear	No augmentation	Not used	There is no risk for dependence between train and test data	Not clear/Insufficiently described	Not used	Not clear	Yes partially	Yes	Not clear/Insufficiently described	No
RW5	107	Joint Model-Pixel Segmentation with Pose-Invariant Deformable Graph-Priors	MICCAI	2013	Yes stated or possible to calculate	No	Not considered	Not clear	No augmentation	Not used	Not used	Not used	Not clear/Insufficiently described	Not clear	No baselines/Nothing to tune	Yes	Cross-validation or other resampling methods	No
RW5	244	Orchestrating Medical Image Compression and Remote Segmentation Networks	MICCAI	2020	Yes stated or possible to calculate	Yes	Not considered	No preprocessing	No augmentation	Not used	There is no risk for dependence between train and test data	Not clear/Insufficiently described	Not used	Not clear	No	No		No
RW5	122	Geodesic Patch-Based Segmentation	MICCAI	2014	Yes stated or possible to calculate	Yes	Not considered	Preprocessing the entire data but no risk of leakage	No augmentation	Not used	There is no risk for dependence between train and test data	Not clear/Insufficiently described	Not used	Not clear	Not clear/Insufficiently described	Yes	Not clear/Insufficiently described	No
RW1	200	Autofocus Layer for Semantic Segmentation	MICCAI	2018	Yes stated or possible to calculate	Yes	Not considered	Preprocessing separately after splitting	Not clear/Insufficiently described	Not used	There is no risk for dependence between train and test data	Done on train set	Done correctly within the loop	Yes	No	Yes	Cross-validation or other resampling methods	Yes
RW1	226	SegNAS3D: Network Architecture Search with Derivative-Free Global Optimization for 3D Image Segmentation	MICCAI	2019	Yes stated or possible to calculate	No	Not considered	Preprocessing the entire data but no risk of leakage	Done on train data	Not used	There is no risk for dependence between train and test data	Done on train set	Done correctly within the loop	Yes	Not clear/Insufficiently described	Yes	Cross-validation or other resampling methods	No
RW1	289	Semi-supervised Histological Image Segmentation via Hierarchical Consistency Enforcement	MICCAI	2022	Yes stated or possible to calculate	Yes	Not considered	Preprocessing separately after splitting	Done on train data	Not used	There is no risk for dependence between train and test data	Not used	Not used	Yes	Not clear/Insufficiently described	No		No
RW1	123	Bone Tumor Segmentation on Bone Scans Using Context Information and Random Forests	MICCAI	2014	Yes stated or possible to calculate	No	Not considered	Preprocessing separately after splitting	No augmentation	Not used	There is no risk for dependence between train and test data	Not used	Done correctly within the loop	Yes	No baselines/Nothing to tune	Yes	Cross-validation or other resampling methods	No
RW1	77	YOLACT: Real-Time Instance Segmentation	ICCV	2019	Referenced	Yes	Not considered	No preprocessing	No augmentation	Not used	Not used	Not used	Not used	Yes	No	No		Yes
RW1	265	A Hybrid Attention Ensemble Framework for Zonal Prostate Segmentation	MICCAI	2021	Yes stated or possible to calculate	Yes	Not considered	Preprocessing separately after splitting	Done on train data	Not used	There is no risk for dependence between train and test data	Not used	Not used	Yes	No	Yes	Not clear/Insufficiently described	No
RW1	59	Predicting Deeper into the Future of Semantic Segmentation	ICCV	2017	Yes stated or possible to calculate	Yes	Not considered	Preprocessing the entire data but no risk of leakage	No augmentation	Not used	There is no risk for dependence between train and test data	Not used	Not used	Yes	Not clear/Insufficiently described	No		Yes
RW1	282	Attentive Symmetric Autoencoder for Brain MRI Segmentation	MICCAI	2022	Yes stated or possible to calculate	Yes	Not considered	Preprocessing the entire data but no risk of leakage	Done on train data	Not used	There is no risk for dependence between train and test data	Not used	Not used	Yes	No	No		No
RW1	13	Image Co-segmentation via Consistent Functional Maps	ICCV	2013	Yes stated or possible to calculate	Yes	Not considered	No preprocessing	No augmentation	Not used	Not used	Not clear/Insufficiently described	Not used	Yes	No	No		No
RW1	185	Segmentation of Cortical and Subcortical Multiple Sclerosis Lesions Based on Constrained Partial Volume Modeling	MICCAI	2017	Yes stated or possible to calculate	No	Not considered	Not clear	No augmentation	Not used	Not clear/Insufficiently described	Not clear/Insufficiently described	Not used	Not clear	No baselines/Nothing to tune	Yes	Other	No
RW1	193	Concurrent Segmentation and Localization for Tracking of Surgical Instruments	MICCAI	2017	Yes stated or possible to calculate	Yes	Not considered	No preprocessing	Done on train data	Not used	There is risk for dependence between train and test data	Not used	Not clear/Insufficiently described	No	No	No		No
RW1	163	Prior-Based Coregistration and Cosegmentation	MICCAI	2016	Yes stated or possible to calculate	Yes	Not considered	No preprocessing	No augmentation	Not used	There is no risk for dependence between train and test data	Not clear/Insufficiently described	Not clear/Insufficiently described	Yes	No	Yes	Not clear/Insufficiently described	No
RW1	37	Segment-Phrase Table for Semantic Segmentation, Visual Entailment and Paraphrasing	ICCV	2015	Not clearly stated	Yes	Not considered	No preprocessing	No augmentation	Not used	Not used	Not used	Not used	Not clear	Not clear/Insufficiently described	No		No
RW1	172	Feature Sensitive Label Fusion with Random Walker for Atlas-Based Image Segmentation	MICCAI	2016	Yes stated or possible to calculate	Yes	Not considered	Not clear	No augmentation	Not used	There is no risk for dependence between train and test data	Not clear/Insufficiently described	Not used	Not clear	Yes partially	Yes	Not clear/Insufficiently described	No
RW1	76	Self-Supervised Difference Detection for Weakly-Supervised Semantic Segmentation	ICCV	2019	Yes stated or possible to calculate	Yes	Not considered	Preprocessing separately after splitting	Not clear/Insufficiently described	Not used	Not used	Not clear/Insufficiently described	Not used	Yes	No	No		No
RW1	250	KISEG: A Three-Stage Segmentation Framework for Multi-level Acceleration of Chest CT Scans from COVID-19 Patients	MICCAI	2020	Yes stated or possible to calculate	Yes	Not considered	No preprocessing	Done on train data	Not used	Not clear/Insufficiently described	Not used	Not used	Not clear	No	No		No
RW1	180	BRIEFnet: Deep Pancreas Segmentation Using Binary Sparse Convolutions	MICCAI	2017	Yes stated or possible to calculate	Yes	Not considered	Preprocessing the entire data but no risk of leakage	No augmentation	Not used	There is no risk for dependence between train and test data	Not used	Done correctly within the loop	Yes	No	No		Yes
RW1-X	140	Automatic 3D US Brain Ventricle Segmentation in Pre-Term Neonates Using Multi-phase Geodesic Level-Sets with Shape Prior	MICCAI	2015
RW1	291	Edge-Oriented Point-Cloud Transformer for 3D Intracranial Aneurysm Segmentation	MICCAI	2022	Yes stated or possible to calculate	Yes	Not considered	No preprocessing	No augmentation	Not used	Not used	Not used	Not clear/Insufficiently described	Not clear	No	No		Yes
RW1	222	Pick-and-Learn: Automatic Quality Evaluation for Noisy-Labeled Image Segmentation	MICCAI	2019	Yes stated or possible to calculate	Yes	Not considered	Preprocessing the entire data but no risk of leakage	No augmentation	Not used	There is no risk for dependence between train and test data	Not clear/Insufficiently described	Not used	Yes	Not clear/Insufficiently described	No		No
RW1	266	CoTr: Efficiently Bridging CNN and Transformer for 3D Medical Image Segmentation	MICCAI	2021	Yes stated or possible to calculate	Yes	Not considered	Preprocessing the entire data but no risk of leakage	Done on train data	Not used	There is no risk for dependence between train and test data	Not clear/Insufficiently described	Not used	Yes	No	No		Yes
RW1	220	CFEA: Collaborative Feature Ensembling Adaptation for Domain Adaptation in Unsupervised Optic Disc and Cup Segmentation	MICCAI	2019	Yes stated or possible to calculate	Yes	Not considered	Preprocessing the entire data but no risk of leakage	Done on train data	Not used	Not used	Not used	Not clear/Insufficiently described	Yes	Not clear/Insufficiently described	No		No
RW1	87	Segmenter: Transformer for Semantic Segmentation	ICCV	2021	Yes stated or possible to calculate	Yes	Not considered	No preprocessing	Done on train data	Not used	Not used	Not used	Not used	Yes	No	No		Yes
RW1	141	Robust Muscle Cell Quantification Using Structured Edge Detection and Hierarchical Segmentation	MICCAI	2015	Yes stated or possible to calculate	No	Not considered	No preprocessing	No augmentation	Not used	Not used	Not used	Not used	Yes	No	Yes	Test set	No
RW1	31	Semantic Image Segmentation via Deep Parsing Network	ICCV	2015	Yes stated or possible to calculate	Yes	Considered	No preprocessing	No augmentation	Not used	Not used	Not clear/Insufficiently described	Not used	Yes	No	No		Yes
RW3	280	Domain Specific Convolution and High Frequency Reconstruction Based Unsupervised Domain Adaptation for Medical Image Segmentation	MICCAI	2022	Yes stated or possible to calculate	Yes	Not considered	Preprocessing the entire data but no risk of leakage	No augmentation	Not used	Not used	Not used	Not used	Yes	No	No		Yes
RW3	258	A Semi-supervised Joint Network for Simultaneous Left Ventricular Motion Tracking and Segmentation in 4D Echocardiography	MICCAI	2020	Yes stated or possible to calculate	Yes	Not considered	Preprocessing the entire data but no risk of leakage	Not clear/Insufficiently described	Not used	There is no risk for dependence between train and test data	Not used	Not used	Not clear	No	No		No
RW3	49	SceneNet RGB-D: Can 5M Synthetic Images Beat Generic ImageNet Pre-training on Indoor Segmentation?	ICCV	2017	Yes stated or possible to calculate	No	Considered	Not clear	No augmentation	Not used	Not clear/Insufficiently described	Not used	Not used	Not clear	No baselines/Nothing to tune	No		Yes
RW3	95	Domain Adaptive Semantic Segmentation with Self-Supervised Depth Estimation	ICCV	2021	Yes stated or possible to calculate	Yes	Not considered	Not clear	No augmentation	Not used	Not used	Not used	Not used	Not clear	No	No		Yes
RW3	161	Dynamically Balanced Online Random Forests for Interactive Scribble-Based Segmentation	MICCAI	2016	Referenced	Yes	Considered	Not clear	No augmentation	Not used	Not used	Not used	Not clear/Insufficiently described	Not clear	No	No		No
RW3-X	75	Event-Based Motion Segmentation by Motion Compensation	ICCV	2019
RW3	276	Multi-phase Liver Tumor Segmentation with Spatial Aggregation and Uncertain Region Inpainting	MICCAI	2021	Yes stated or possible to calculate	No	Not considered	Preprocessing the entire data but no risk of leakage	Done on train data	Not used	Not used	Not used	Done correctly within the loop	Yes	No	No		Yes
RW3-X	164	Orientation-Sensitive Overlap Measures for the Validation of Medical Image Segmentations	MICCAI	2016
RW3	287	Atlas-Based Semantic Segmentation of Prostate Zones	MICCAI	2022	Yes stated or possible to calculate	No	Not considered	Preprocessing the entire data but no risk of leakage	Done on train data	Not used	Not clear/Insufficiently described	Not used	Not used	Not clear	No	Yes	Not clear/Insufficiently described	Yes
RW3-X	144	Automated Segmentation of Surgical Motion for Performance Analysis and Feedback	MICCAI	2015
RW3	151	Graph-Based Motion-Driven Segmentation of the Carotid Atherosclerotique Plaque in 2D Ultrasound Sequences	MICCAI	2015	Yes stated or possible to calculate	No	Not considered	Not clear	No augmentation	Not used	Not used	Not clear/Insufficiently described	Done correctly within the loop	Not clear	No baselines/Nothing to tune	Yes	Cross-validation or other resampling methods	No
RW3	299	DeepPyramid: Enabling Pyramid View and Deformable Pyramid Reception for Semantic Segmentation in Cataract Surgery Videos	MICCAI	2022	Yes stated or possible to calculate	Yes	Not considered	Preprocessing the entire data but no risk of leakage	Done on train data	Not used	Not used	Not clear/Insufficiently described	Not used	Not clear	Yes partially	No		Yes
RW3	73	VV-Net: Voxel VAE Net With Group Convolutions for Point Cloud Segmentation	ICCV	2019	Some are stated and some are referenced	Yes	Not clear/Insufficiently described	Not clear	No augmentation	Not used	Not used	Not used	Not used	Not clear	No	No		Yes
RW3-X	30	Semi-Supervised Normalized Cuts for Image Segmentation	ICCV	2015
RW3	86	RPVNet: A Deep and Efficient Range-Point-Voxel Fusion Network for LiDAR Point Cloud Segmentation	ICCV	2021	Yes stated or possible to calculate	Yes	Not considered	Preprocessing the entire data but no risk of leakage	Done on train data	Not used	There is no risk for dependence between train and test data	Not used	Not used	Yes	No	No		No
RW3	218	Bayesian VoxDRN: A Probabilistic Deep Voxelwise Dilated Residual Network for Whole Heart Segmentation from 3D MR Images	MICCAI	2018	Yes stated or possible to calculate	Yes	Not considered	Preprocessing separately after splitting	Done on train data	Not used	There is no risk for dependence between train and test data	Not used	Done correctly within the loop	Yes	No	No		No
RW3	91	Learning with Noisy Labels for Robust Point Cloud Segmentation	ICCV	2021	Yes stated or possible to calculate	Yes	Not considered	Preprocessing separately after splitting	No augmentation	Not used	Not used	Not used	Not used	Yes	Yes partially	No		Yes
RW3	283	Thoracic Lymph Node Segmentation in CT Imaging via Lymph Node Station Stratification and Size Encoding	MICCAI	2022	Yes stated or possible to calculate	Yes	Not considered	Preprocessing the entire data but no risk of leakage	Done on train data	Not used	There is no risk for dependence between train and test data	Not used	Done correctly within the loop	Yes	No	Yes	Cross-validation or other resampling methods	No
RW3	82	Pseudo-mask Matters in Weakly-supervised Semantic Segmentation	ICCV	2021	Yes stated or possible to calculate	Yes	Not considered	Preprocessing separately after splitting	No augmentation	Not used	Not used	Not used	Not used	Yes	No	No		Yes
RW3	277	Self-supervised Correction Learning for Semi-supervised Biomedical Image Segmentation	MICCAI	2021	Yes stated or possible to calculate	Yes	Not considered	Preprocessing the entire data but no risk of leakage	Done on train data	Not used	Not used	Not used	Not used	Yes	No	No		Yes
RW3-X	170	Multivariate Mixture Model for Cardiac Segmentation from Multi-Sequence MRI	MICCAI	2016
RW3	55	Pixel-Level Matching for Video Object Segmentation Using Convolutional Neural Networks	ICCV	2017	Not clearly stated	Yes	Not considered	Not clear	No augmentation	Not used	Not used	Not used	Not clear/Insufficiently described	Not clear	No	No		No
RW3	278	Hepatocellular Carcinoma Segmentation from Digital Subtraction Angiography Videos Using Learnable Temporal Difference	MICCAI	2021	Yes stated or possible to calculate	No	Not considered	No preprocessing	No augmentation	Not used	Not used	Not used	Not used	Yes	No	No		No
RW3-X	128	Coupled Sparse Dictionary for Depth-Based Cup Segmentation from Single Color Fundus Image	MICCAI	2014
RW3	232	A Deep Learning Design for Improving Topology Coherence in Blood Vessel Segmentation	MICCAI	2019	Yes stated or possible to calculate	Yes	Not considered	Preprocessing separately after splitting	Done on train data	Not used	Not used	Done on train set	Not used	Yes	No	No		Yes
RW3	264	SGNet: Structure-Aware Graph-Based Network for Airway Semantic Segmentation	MICCAI	2021	Yes stated or possible to calculate	Yes	Not considered	Preprocessing the entire data but no risk of leakage	Done on train data	Not used	Not used	Not clear/Insufficiently described	Not used	Not clear	No	No		No
RW3	40	Semi Supervised Semantic Segmentation Using Generative Adversarial Network	ICCV	2017	Some are stated and some are referenced	Yes	Not considered	No preprocessing	No augmentation	Not used	There is no risk for dependence between train and test data	Not used	Not used	Yes	No	No		No
RW3	174	Iterative Multi-domain Regularized Deep Learning for Anatomical Structure Detection and Segmentation from Ultrasound Images	MICCAI	2016	Yes stated or possible to calculate	No	Not considered	No preprocessing	No augmentation	Not used	Not used	Not used	Not used	Yes	No	No		No
RW3-X	18	Semi-supervised Learning for Large Scale Image Cosegmentation	ICCV	2013
RW3-X	124	Application-Driven MRI: Joint Reconstruction and Segmentation from Undersampled MRI Data	MICCAI	2014
RW3	25	Introducing Geometry in Active Learning for Image Segmentation	ICCV	2015	Some are stated and some are referenced	Yes	Not considered	Not clear	No augmentation	Not used	Not clear/Insufficiently described	Not used	Not used	Not clear	No	No		No
RW3	6	Semantic Segmentation without Annotating Segments	ICCV	2013	Some are stated and some are referenced	Yes	Not considered	No preprocessing	No augmentation	Not used	Not used	Not used	Not used	Yes	No	No		No
RW3-X	74	Rescan: Inductive Instance Segmentation for Indoor RGBD Scans	ICCV	2019
RW3	103	Learning a Structured Graphical Model with Boosted Top-Down Features for Ultrasound Image Segmentation	MICCAI	2013	Yes stated or possible to calculate	No	Not considered	No preprocessing	No augmentation	Not used	Not used	Not used	Done correctly within the loop	Yes	No	Yes	Cross-validation or other resampling methods	No
RW4	294	RT-DNAS: Real-Time Constrained Differentiable Neural Architecture Search for 3D Cardiac Cine MRI Segmentation	MICCAI	2022	Referenced	Yes	Not considered	No preprocessing	No augmentation	Not used	There is no risk for dependence between train and test data	Done on train/validation set	Not used	Yes	Yes partially	Yes	Cross-validation or other resampling methods	No
RW4	251	KiU-Net: Towards Accurate Segmentation of Biomedical Images Using Over-Complete Representations	MICCAI	2020	Yes stated or possible to calculate	No	Not considered	No preprocessing	No augmentation	Not used	Not used	Not used	Not used	Yes	No	Not clear/Insufficiently described	Cross-validation or other resampling methods	Yes
RW4-X	3	Video Segmentation by Tracking Many Figure-Ground Segments	ICCV	2013
RW4	241	Feature Preserving Smoothing Provides Simple and Effective Data Augmentation for Medical Image Segmentation	MICCAI	2020	Referenced	Yes	Considered	Not clear	Done on train data	Not used	Not used	Not used	Not used	Yes	No baselines/Nothing to tune	No		No
RW4	227	Brain Segmentation from k-Space with End-to-End Recurrent Attention Network	MICCAI	2019	Yes stated or possible to calculate	Yes	Not considered	Preprocessing separately after splitting	No augmentation	Not used	Not used	Not used	Not used	Yes	No	No		No
RW4	272	Towards Robust General Medical Image Segmentation	MICCAI	2021	Yes stated or possible to calculate	Yes	Not considered	Preprocessing the entire data before split with risk of leakage	Not clear/Insufficiently described	Not used	Not used	Not used	Not used	Yes	No	No		Yes
RW4	148	Segmentation of Infant Hippocampus Using Common Feature Representations Learned for Multimodal Longitudinal Data	MICCAI	2015	Yes stated or possible to calculate	No	Considered	Preprocessing the entire data before split with risk of leakage	No augmentation	Not used	There is no risk for dependence between train and test data	Not used	Not used	Yes	No baselines/Nothing to tune	Yes	Test set	No
RW4	246	Weakly-Supervised Nucleus Segmentation Based on Point Annotations: A Coarse-to-Fine Self-Stimulated Learning Strategy	MICCAI	2020	Yes stated or possible to calculate	Yes	Not considered	Preprocessing the entire data before split with risk of leakage	Done on train data	Not used	Not used	Not used	Not used	Yes	No	Yes	Cross-validation or other resampling methods	Yes
RW4	205	A No-Reference Quality Metric for Retinal Vessel Tree Segmentation	MICCAI	2018	Yes stated or possible to calculate	Yes	Considered	No preprocessing	No augmentation	Not used	Not used	Not used	Not used	Yes	No baselines/Nothing to tune	No		No
RW4	98	Mutual-Complementing Framework for Nuclei Detection and Segmentation in Pathology Image	ICCV	2021	Yes stated or possible to calculate	Yes	Not considered	Not clear	Not clear/Insufficiently described	Not used	Not used	Not used	Not used	Not clear	No	Yes	Test set	No
RW4	54	Dynamics Enhanced Multi-camera Motion Segmentation from Unsynchronized Videos	ICCV	2017	Yes stated or possible to calculate	No	Considered	Not clear	No augmentation	Not used	There is no risk for dependence between train and test data	Not used	Not used	Yes	No	No		No
RW4	51	3D Graph Neural Networks for RGBD Semantic Segmentation	ICCV	2017	Yes stated or possible to calculate	Yes	Not considered	No preprocessing	No augmentation	Not used	Not used	Not clear/Insufficiently described	Not used	Yes	Not clear/Insufficiently described	No		No
RW4	286	Discrepancy-Based Active Learning for Weakly Supervised Bleeding Segmentation in Wireless Capsule Endoscopy Images	MICCAI	2022	Yes stated or possible to calculate	Yes	Not considered	Preprocessing separately after splitting	Not clear/Insufficiently described	Done on the train data only	Not used	Not used	Not used	Yes	No	Yes	Cross-validation or other resampling methods	Yes
RW4	76	Self-Supervised Difference Detection for Weakly-Supervised Semantic Segmentation	ICCV	2019	Referenced	Yes	Not considered	Not clear	Done on train data	Not used	Not used	Done on train/validation set	Not used	Yes	No	No		No
RW4	250	KISEG: A Three-Stage Segmentation Framework for Multi-level Acceleration of Chest CT Scans from COVID-19 Patients	MICCAI	2020	Yes stated or possible to calculate	Yes	Not considered	Not clear	Done on train data	Not used	There is no risk for dependence between train and test data	Not clear/Insufficiently described	Not used	Yes	No baselines/Nothing to tune	No		No
RW4	180	BRIEFnet: Deep Pancreas Segmentation Using Binary Sparse Convolutions	MICCAI	2017	Yes stated or possible to calculate	Yes	Not considered	Preprocessing the entire data but no risk of leakage	No augmentation	Not used	There is no risk for dependence between train and test data	Not clear/Insufficiently described	Not used	Yes	No baselines/Nothing to tune	No		No
RW4	140	Automatic 3D US Brain Ventricle Segmentation in Pre-Term Neonates Using Multi-phase Geodesic Level-Sets with Shape Prior	MICCAI	2015	Yes stated or possible to calculate	No	Not considered	No preprocessing	No augmentation	Done on the train data only	There is risk for dependence between train and test data	Done on train/validation set	Not used	Yes	No baselines/Nothing to tune	Yes	Cross-validation or other resampling methods	No
RW4	291	Edge-Oriented Point-Cloud Transformer for 3D Intracranial Aneurysm Segmentation	MICCAI	2022	Yes stated or possible to calculate	Yes	Not considered	Not clear	No augmentation	Not used	There is risk for dependence between train and test data	Not clear/Insufficiently described	Not used	Yes	No	No		Yes
RW4	222	Pick-and-Learn: Automatic Quality Evaluation for Noisy-Labeled Image Segmentation	MICCAI	2019	Yes stated or possible to calculate	Yes	Not considered	Preprocessing the entire data but no risk of leakage	No augmentation	Not used	Not used	Test set is included	Not used	No	Not clear/Insufficiently described	No		No
RW4	266	CoTr: Efficiently Bridging CNN and Transformer for 3D Medical Image Segmentation	MICCAI	2021	Yes stated or possible to calculate	Yes	Not considered	Preprocessing the entire data but no risk of leakage	Done on train data	Not used	There is no risk for dependence between train and test data	Done on train/validation set	Not used	Yes	No	No		Yes
RW4	220	CFEA: Collaborative Feature Ensembling Adaptation for Domain Adaptation in Unsupervised Optic Disc and Cup Segmentation	MICCAI	2019	Yes stated or possible to calculate	Yes	Not considered	Preprocessing the entire data but no risk of leakage	Not clear/Insufficiently described	Not used	Not used	Done on train/validation set	Not used	Yes	No	No		No
RW4	87	Segmenter: Transformer for Semantic Segmentation	ICCV	2021	Yes stated or possible to calculate	Yes	Not considered	Not clear	Done on train data	Not used	Not used	Done on train/validation set	Not used	Yes	Yes partially	No		Yes
RW4	141	Robust Muscle Cell Quantification Using Structured Edge Detection and Hierarchical Segmentation	MICCAI	2015	Yes stated or possible to calculate	No	Not considered	Not clear	No augmentation	Not used	Not used	Test set is included	Not used	No	Not clear/Insufficiently described	Yes	Test set	No
RW4	25	Introducing Geometry in Active Learning for Image Segmentation	ICCV	2015	No	Yes	Considered	Not clear	No augmentation	Not used	Not clear/Insufficiently described	Not clear/Insufficiently described	Not used	Not clear	No	No		No
RW4	6	Semantic Segmentation without Annotating Segments	ICCV	2013	Referenced	Yes	Not considered	Preprocessing separately after splitting	No augmentation	Not used	Not used	Not used	Not used	Yes	No	No		No
RW4	74	Rescan: Inductive Instance Segmentation for Indoor RGBD Scans	ICCV	2019	Yes stated or possible to calculate	No	Not considered	Not clear	No augmentation	Not used	There is no risk for dependence between train and test data	Test set is included	Not used	No	No baselines/Nothing to tune	No		No
RW4	103	Learning a Structured Graphical Model with Boosted Top-Down Features for Ultrasound Image Segmentation	MICCAI	2013	Yes stated or possible to calculate	No	Not considered	Not clear	No augmentation	Not used	Not used	Done on train/validation set	Not used	Yes	No	Yes	Cross-validation or other resampling methods	No
RW4	31	Semantic Image Segmentation via Deep Parsing Network	ICCV	2015	Yes stated or possible to calculate	Yes	Not considered	Preprocessing separately after splitting	No augmentation	Not used	Not used	Done on train/validation set	Not used	Yes	No	No		No
RW4	107	Joint Model-Pixel Segmentation with Pose-Invariant Deformable Graph-Priors	MICCAI	2013	Not clearly stated	No	Not considered	Not clear	No augmentation	Not used	Not used	Not clear/Insufficiently described	Not used	Not clear	No baselines/Nothing to tune	Yes	Cross-validation or other resampling methods	No
RW4	244	Orchestrating Medical Image Compression and Remote Segmentation Networks	MICCAI	2020	Yes stated or possible to calculate	Yes	Not considered	No preprocessing	No augmentation	Not used	There is no risk for dependence between train and test data	Not clear/Insufficiently described	Not used	Yes	No	No		No
RW4	122	Geodesic Patch-Based Segmentation	MICCAI	2014	Yes stated or possible to calculate	Yes	Not considered	Preprocessing the entire data but no risk of leakage	No augmentation	Not used	There is no risk for dependence between train and test data	Not clear/Insufficiently described	Not used	Not clear	Not clear/Insufficiently described	Yes	Not clear/Insufficiently described	No
